# Supplementary material
Source: PubMed Central journal article supplement (PMC7546134)

PCR screening for polyomavirus (10 rabbits -40 samples) 1-10: oral 11-20: skin 21-30: blood 31-40: feces

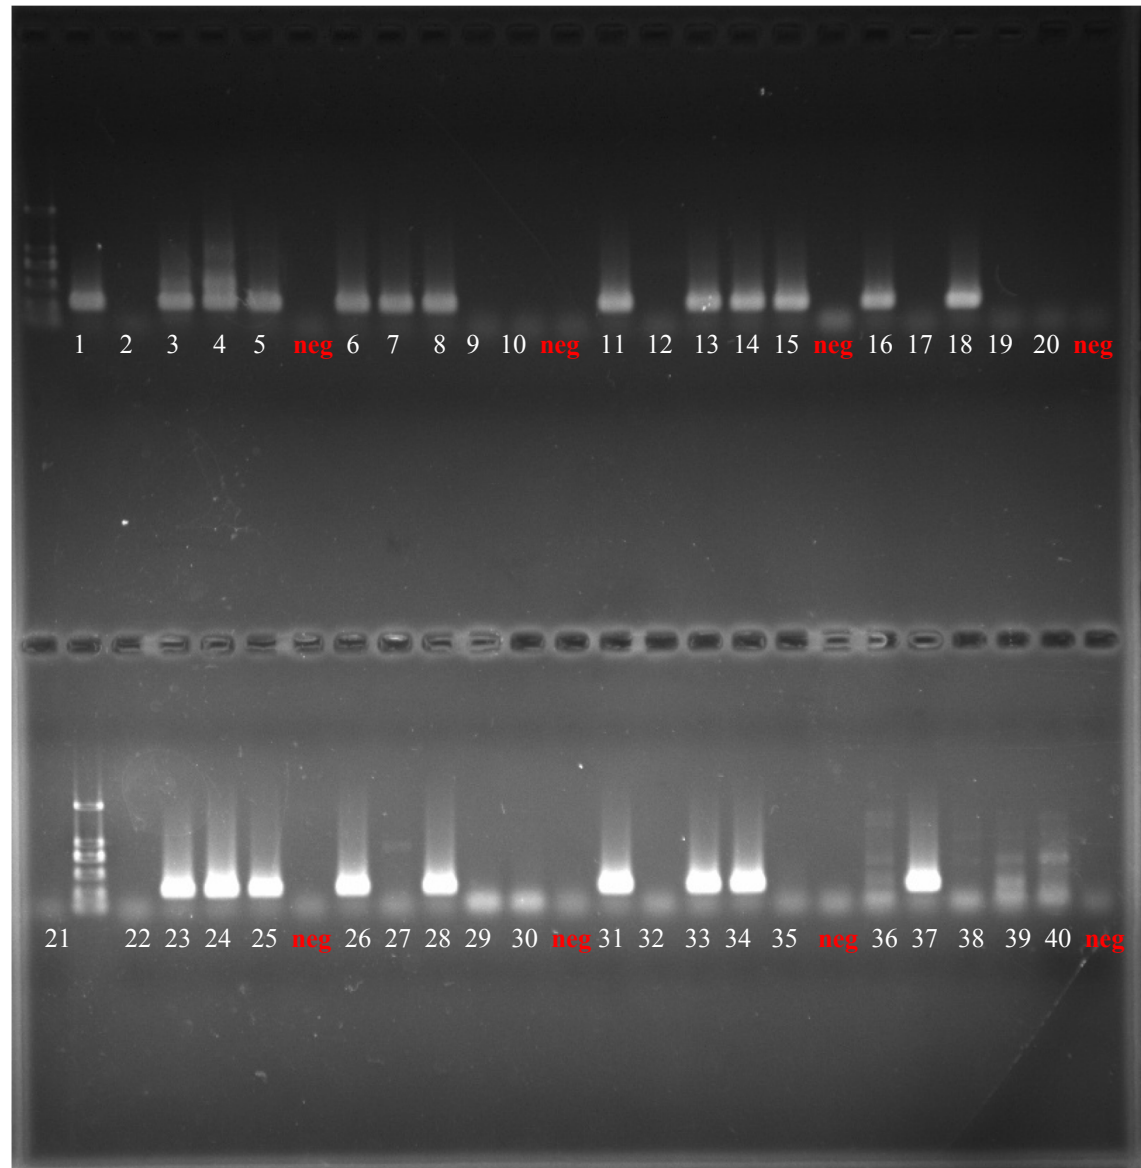

PCR screening for polymomavirus (28 rabbits -84 samples positive confirmation) 1-28: oral 29-56: blood 57-84: feces

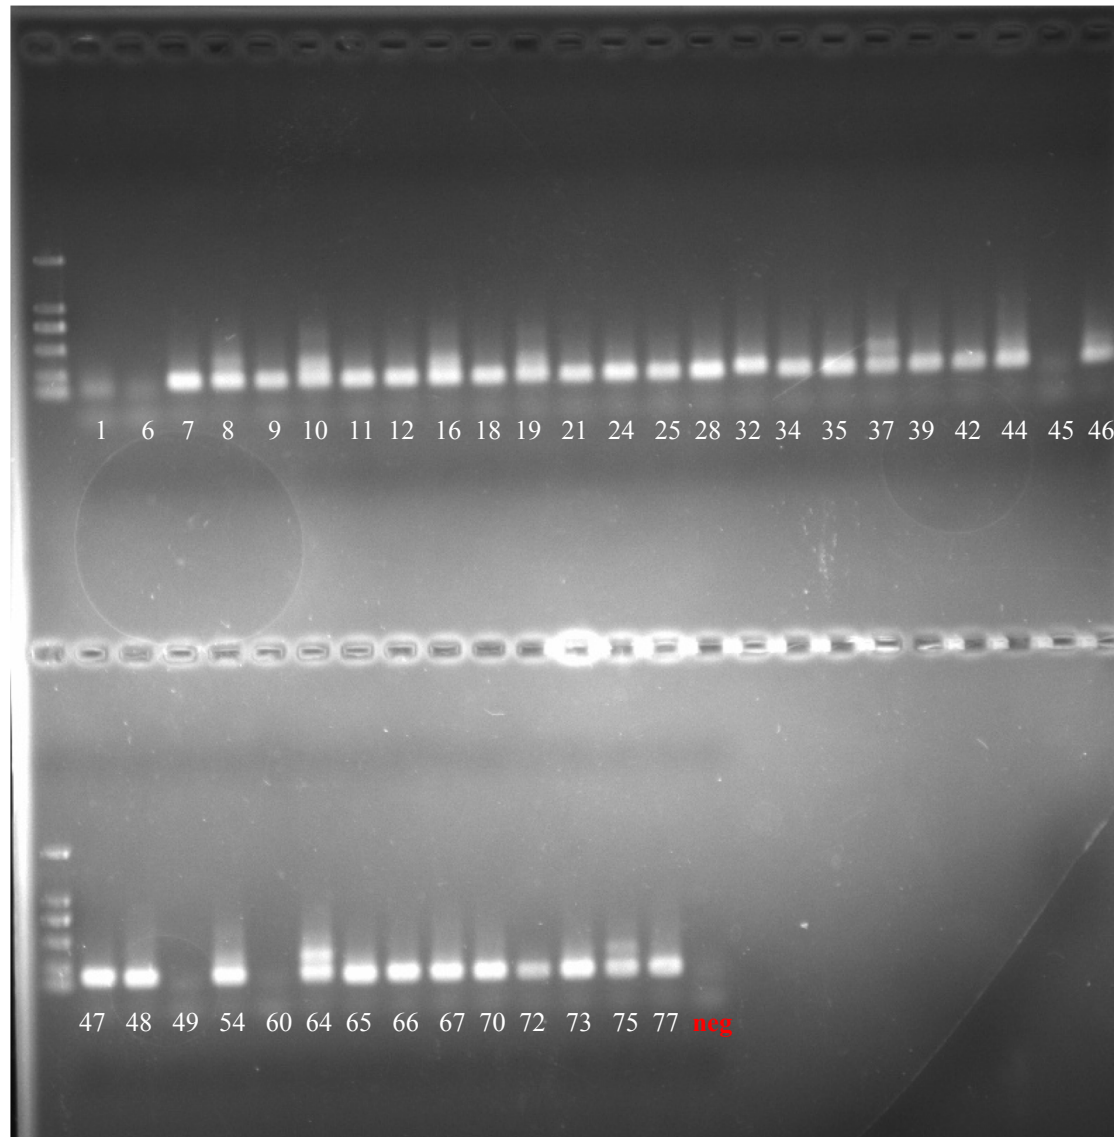

PCR screening for bocavirus (10 rabbits -40 samples) 1-10: oral 11-20: skin 21-30: blood 31-40: feces

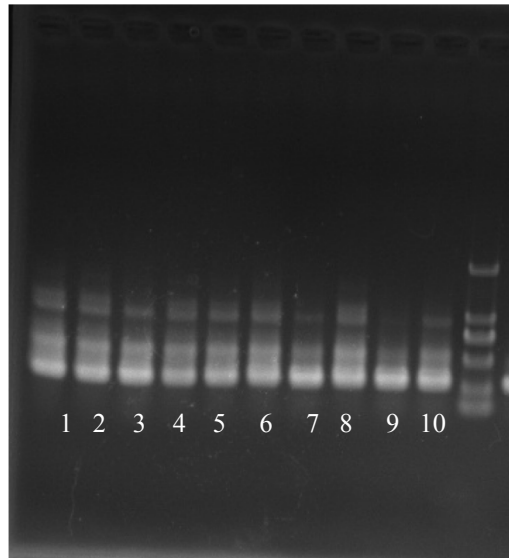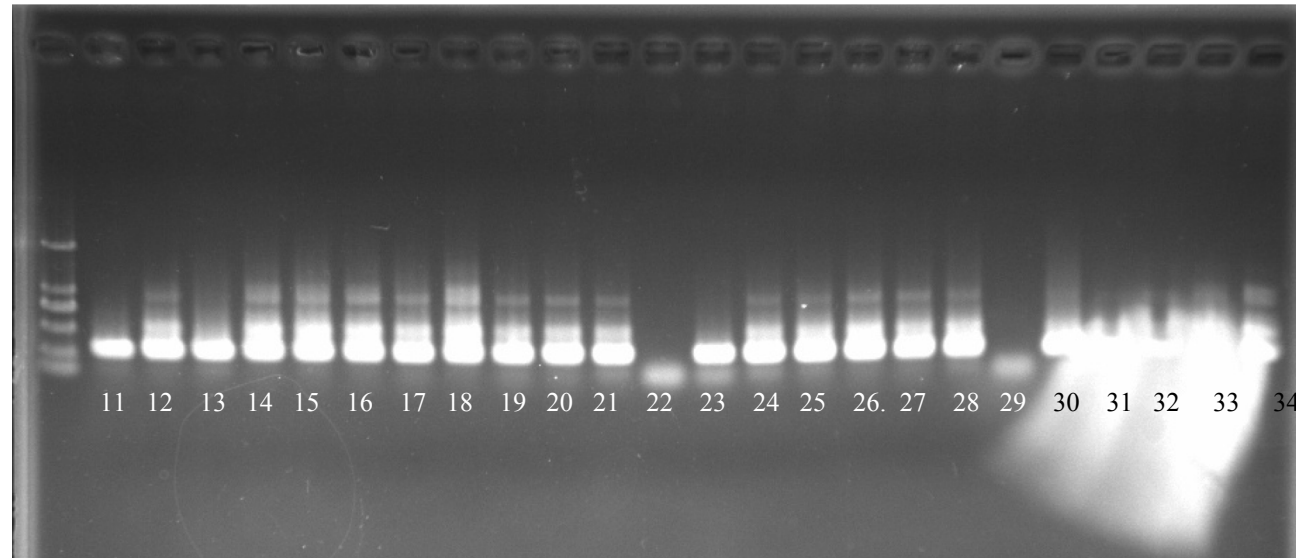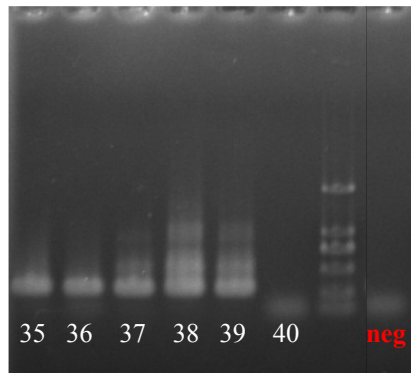

PCR screening for bocavirus (28 rabbits -84 samples) 1-28: oral 29-56: blood 57-84: feces

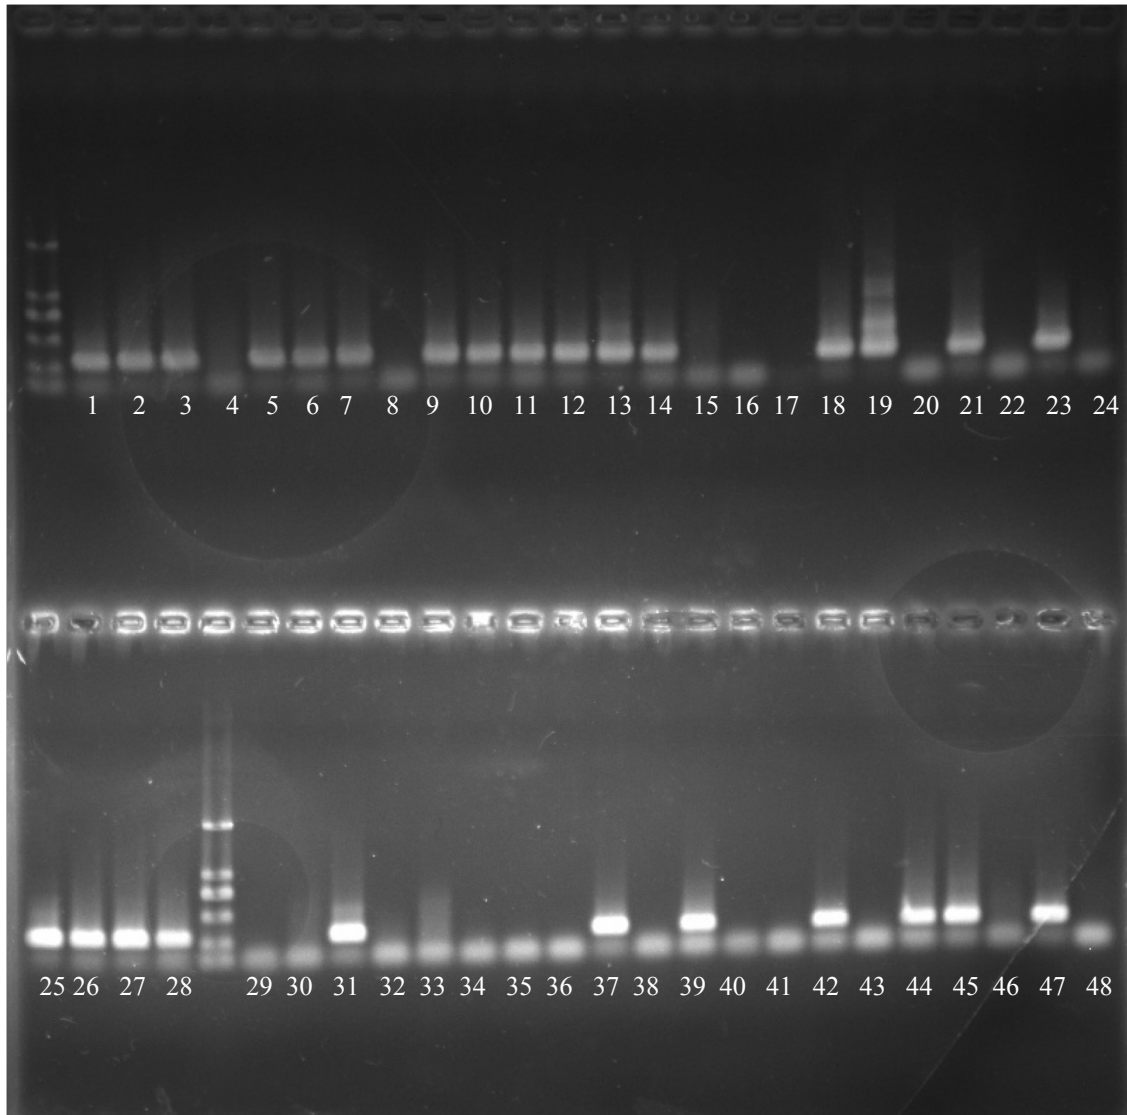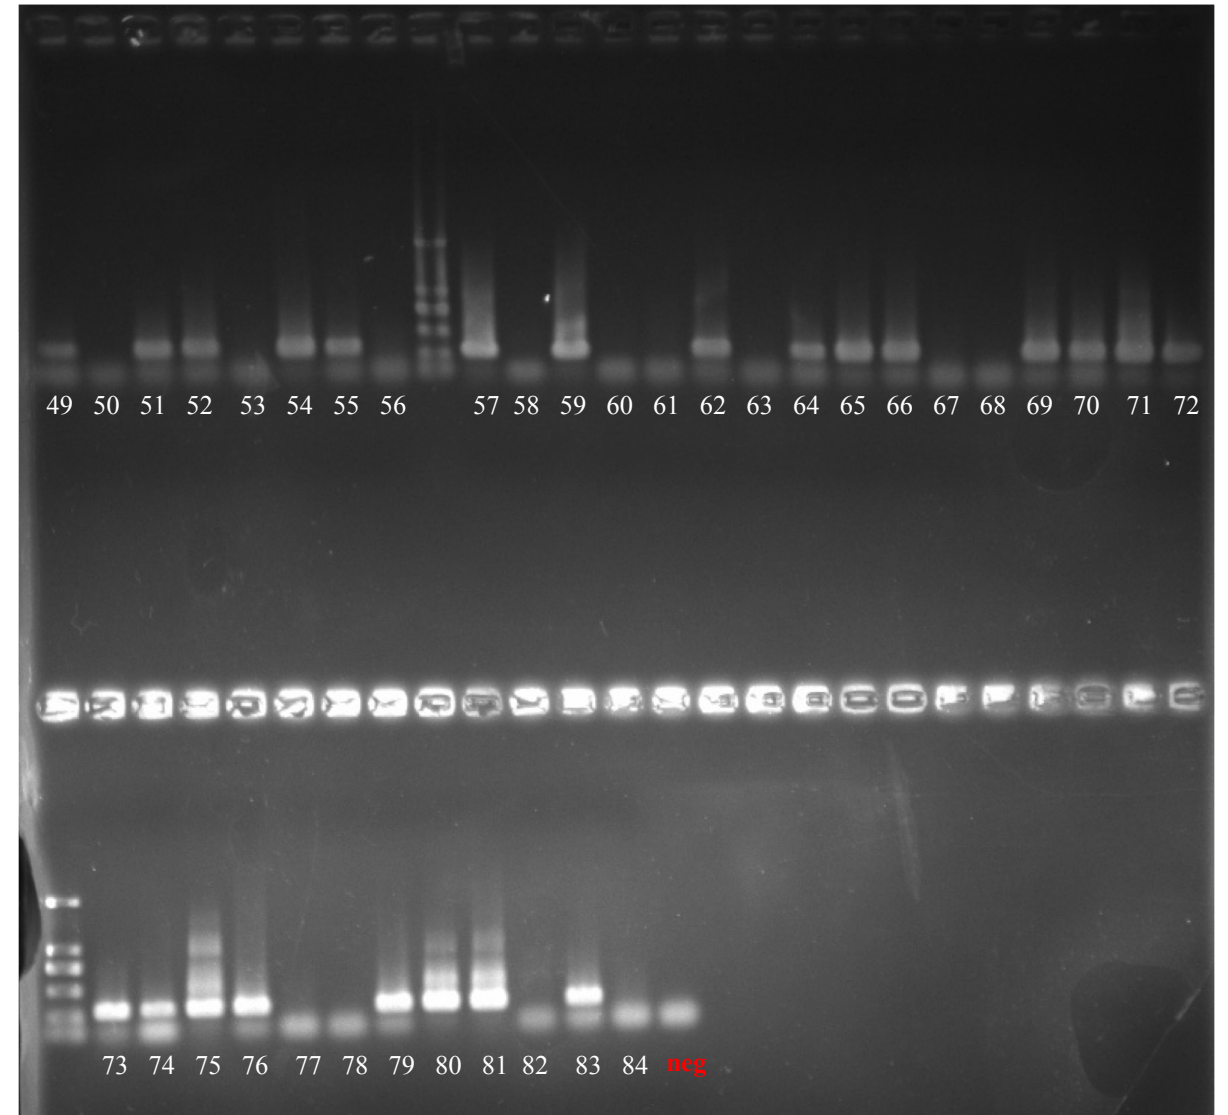



PCR screening for bocavirus (28 rabbits -84 samples positive confirmation)

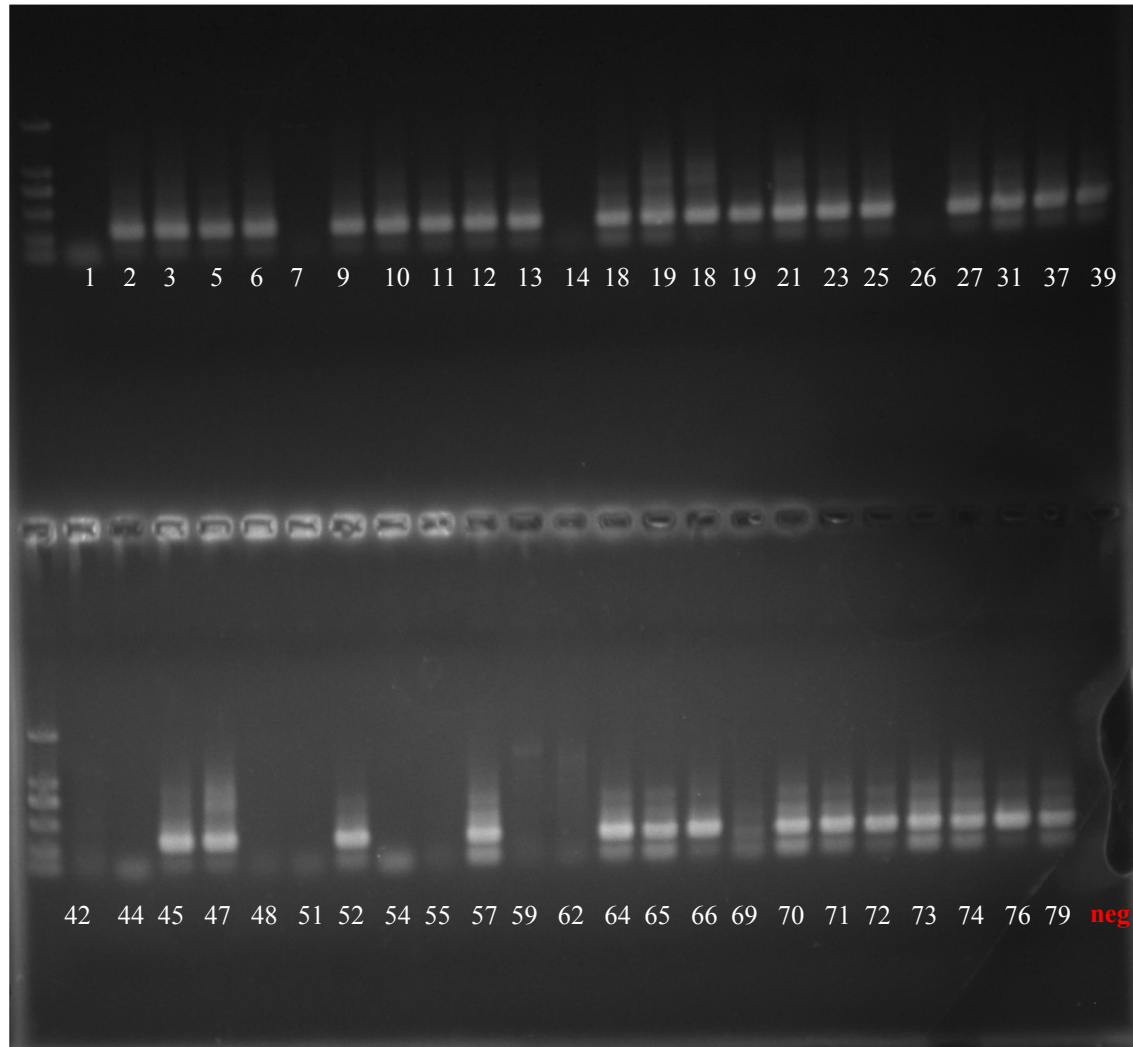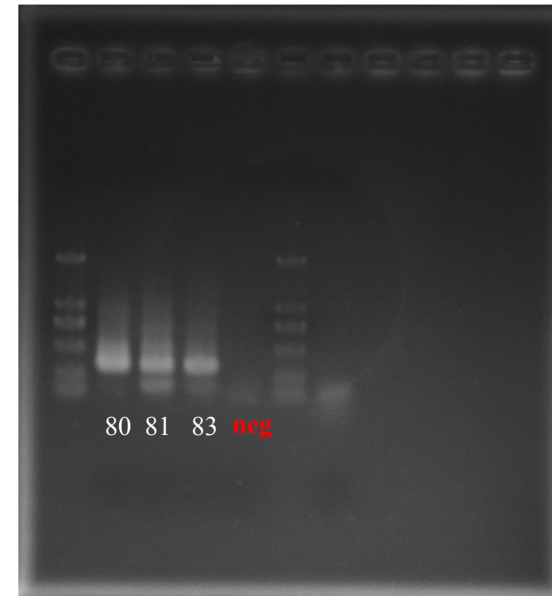

Supplement: 705_2020_4808_MOESM2_ESM.pdf [file 705_2020_4808_MOESM2_ESM.pdf]
